# Supplementary material for: Editing of endogenous tubulins reveals varying effects of tubulin posttranslational modifications on axonal growth and regeneration
Source: eLife journal article supplement (doi:10.7554/elife.94583), 2024-03-01

Figure 3E raw image

|          |     |     |      |      |       |       |       |
|----------|-----|-----|------|------|-------|-------|-------|
| Tubulins | +   | +   | -    | +    | -     | +     | +     |
| ATP      | -   | +   | +    | +    | +     | +     | +     |
| Kinase   | -   | -   | CDK1 | CDK1 | MBK-2 | MBK-2 | MBK-2 |
| Buffer   | MEM | MEM | MEM  | MEM  | MEM   | MEM   | BRB80 |

|          |     |     |      |      |       |       |       |
|----------|-----|-----|------|------|-------|-------|-------|
| Tubulins | +   | +   | -    | +    | -     | +     | +     |
| ATP      | -   | +   | +    | +    | +     | +     | +     |
| Kinase   | -   | -   | CDK1 | CDK1 | MBK-2 | MBK-2 | MBK-2 |
| Buffer   | MEM | MEM | MEM  | MEM  | MEM   | MEM   | BRB80 |

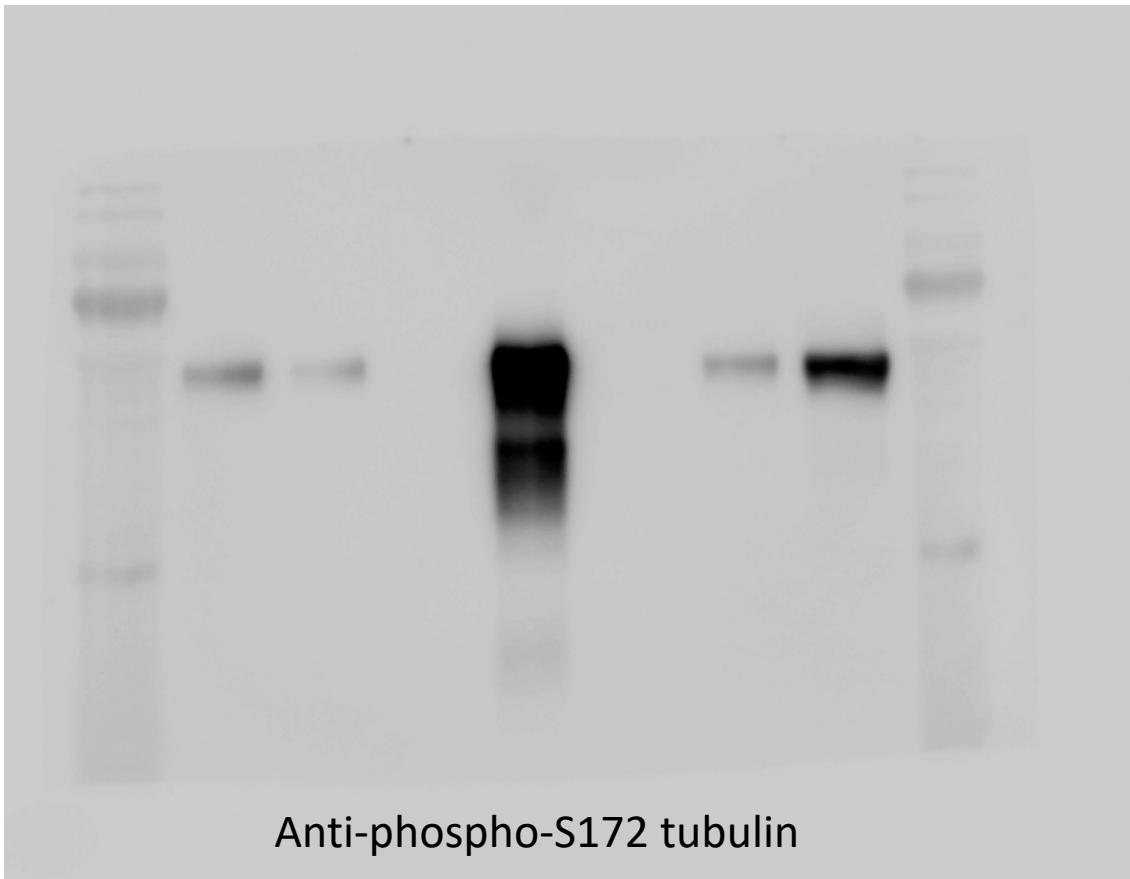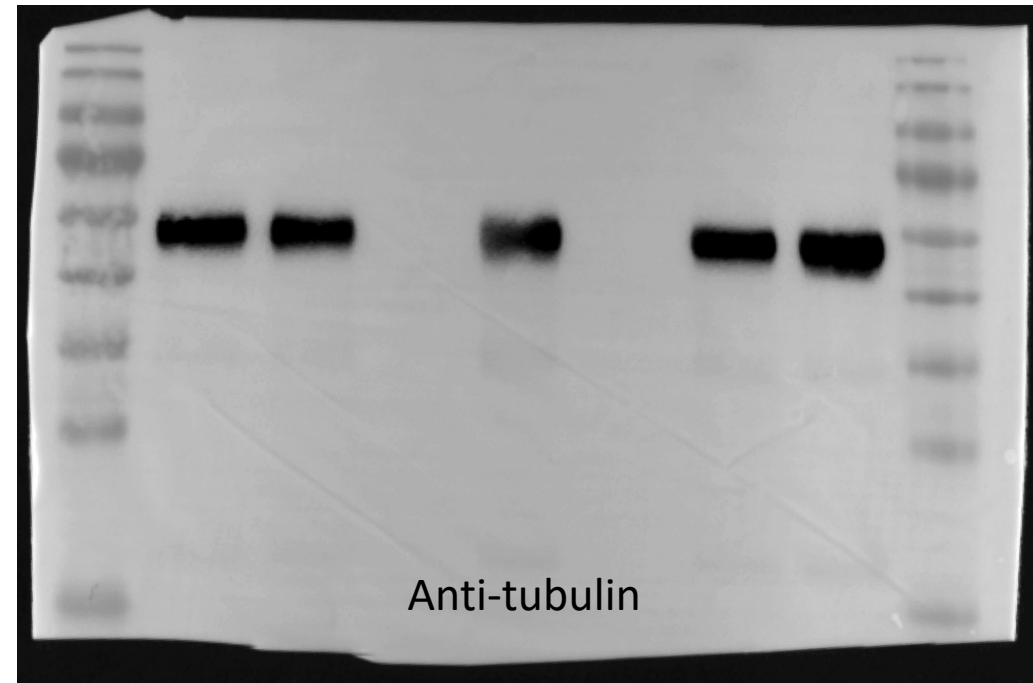

Figure 3 – figure supplement 3 raw image

|               |        |        |        |        |        |      |
|---------------|--------|--------|--------|--------|--------|------|
| Tubulins      | -      | +      | +      | +      | +      | +    |
| ATP           | +      | +      | +      | +      | +      | +    |
| MBK-2<br>(nM) | 1742   | 0      | 800    | 1268   | 1742   | 1742 |
| Buffer        | BRB 80 | BRB 80 | BRB 80 | BRB 80 | BRB 80 | MEM  |

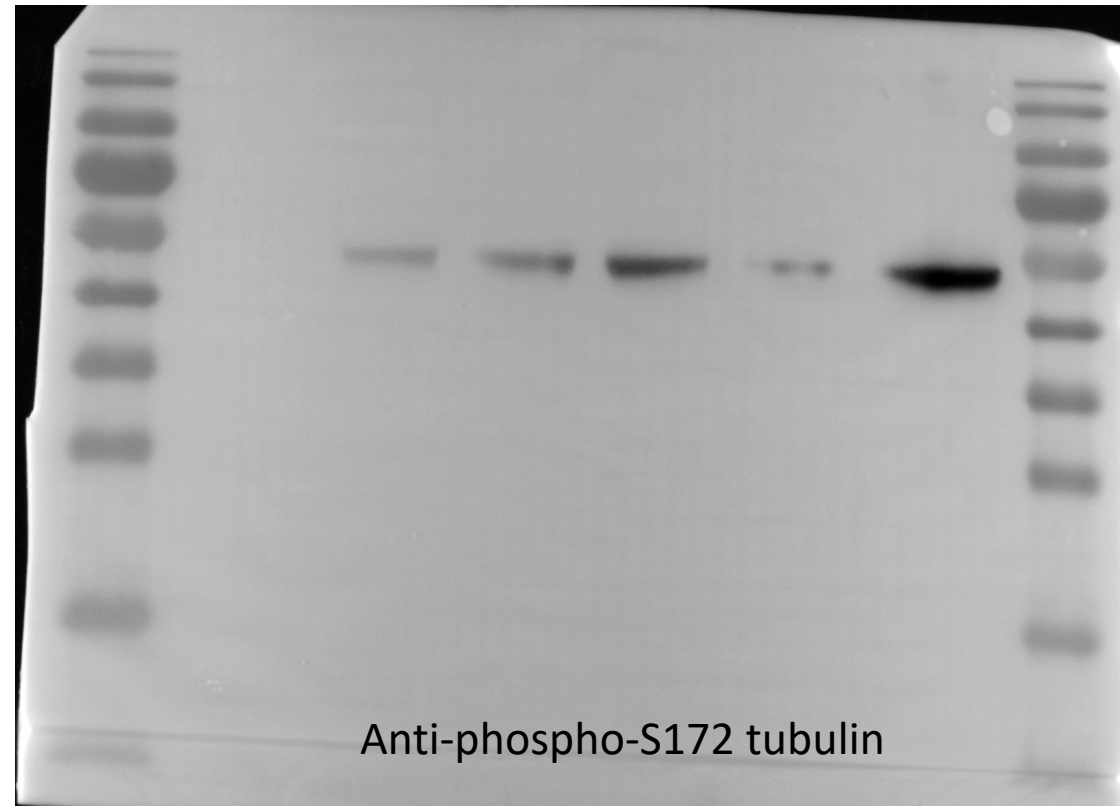

Supplement: fig3-data2 [file elife-94583-fig3-data2-v1.pdf]
