# Supplementary material for: Editing of endogenous tubulins reveals varying effects of tubulin posttranslational modifications on axonal growth and regeneration
Source: eLife. 2024 Jul 1;13:RP94583. doi: 10.7554/eLife.94583 (PMC11216746; doi:10.7554/eLife.94583)
Supplement: Figure 1—figure supplement 1—source data 1. [file elife-94583-fig1-figsupp1-data1.xlsx]

## Sheet: Figure 1-figure supplement 1
1B. PLM-AN terminus to vulval distance				1C. ALM-PN length
WT	mec-7(S172E)/+	mec-7(S172E)		WT	mec-7(S172A)/+	mec-7(S172A)
155.21	68.66	-239.07		1.52	37.71	60.31
132.41	23.66	-253.85		2.28	27.48	59.74
126.03	44.58	-173.06		0.58	56.25	36.97
98.65	44.07	-243.41		7.42	4.88	46.58
111.33	111.1	-120.45		1.2	36.44	127.82
118.64	30.24	-132.07		0	43.48	36.98
85.87	45.33	-193.17		11.97	31.46	53.57
78.5	39.45	-158.41		7.58	28.35	44.84
108.12	67.77	-268.19		4.43	28.26	38.29
104.24	38.83	-305.45		3.49	21.28	73.38
86.35	68.56	-324.26		0.97	28.89	47.58
107.39	57.7	-398.55		5.25	8.44	59.23
72.9	24.66	-56.24		11.88	34.12	24.68
93.2	50.65	-132.07		6.26	33.1	39.71
114.99	35.34	-251.58		17.38	23.87	42.16
64.34	43.62	-250.57		11.08	31.3	35.12
102.86	53.38	-284.06		3.3	43.81	37.8
35.99	47.01	-290.01		4.68	17.57	39.84
87.75	-35.85	-217.95		2.71	34.05	30.78
151.88	52.32	-242.24		3.14	15.07	38.16
120.02	60.09	-237.88		4.38	13.64	56.78
53.87	49.41	-254.04		0	15.21	60.79
102.32	92.94	-227.14		0	58.64	20.85
118.05	54.08	-232.65		5.35	10.22	55.22
82.41	100.85	-273.45		21.65	8.46	38.48
111.84	45.67	-239.41		6.72	20.35	41.28
154.34	41.37	-238.12		5.82	10.66	78.58
114.28	31.86	-220.12		12.74	35.85	46.81
88.05	49.59	-148.78		24.62	10.01	66.83
126.48	35.81	-142.21		0	40.95	35.19
137.13	35.95	-251.16		8.72	29.33	38.42
47.46	30.38	-223.62		3.83	24.51	79.41
90.49	82.28	-195.32		15.01	22.36	44.82
153.25	98.65	-275.02		21.01	35.14	43.52
171.12	53.77	-249.42		7.42	30.18	30.73
153.62	107.33	-105.83		0	41.02	25.59
89.13	27.49	-81.05		4.55	17.99	97.63
28.84	26.94	-212.56		0	40.98	61.4
80.32	44.96	-76.96		12.11	6.77	54.91
58.26	27.95	-212.79		1.73	39.61	48.89
86.54	23.4			4.35	16.05	60.94
125.98				3.35	33.3	37.33
111.05				0	6.41	63.8
95.98				3.83	37.9	45.37
99.77				12.61	13.11	39.67
				0	28.17	55.08
				5.13	11.31	59.28
				3.72	23.23	31.76
				6.35	31.52	17.26
						29.43
						65.06
						64.67
						24.01
						55.74
