# Supplementary material for: Editing of endogenous tubulins reveals varying effects of tubulin posttranslational modifications on axonal growth and regeneration
Source: eLife. 2024 Jul 1;13:RP94583. doi: 10.7554/eLife.94583 (PMC11216746; doi:10.7554/eLife.94583)
Supplement: Figure 1—figure supplement 2—source data 1. [file elife-94583-fig1-figsupp2-data1.xlsx]

## Sheet: Figure 1-figure supplement 2
2B. Fluorescent intenstiy
WT	mec-7(S172A)	mec-7(S172E)
65.25	53.27	53.76
48.68	38	42.39
57.8	61.3	40.85
59.28	41.44	88.98
47.38	34.59	91.65
57	35.84	70.9
59.02	33.87	72.11
87.12	38.99	28.68
47.77	33.58	57.14
77.35	38.24	40
57.71	35.88	40.12
55.73	40.71	45.33
46.69	33.89	63.9
47.13	24.83	23.58
54.74	31.08	45.59
37.93	32.42	28.11
31.94	30.81	50.33
41.08	33.11	37.58
41.54	29.81	30.06
68.62	32.52	40.79
64.58	34.09	49.23
55.57	31.14	74.87
58.33	31.85	56.78
37.2	26.46	83.21
37.76	23.42	45.75
33.72	23.57	36.1
45.32	27.71	40.26
53.12	34.37	51.08
34.36	36.26	52.45
72.07	46.15	53.71
64.31	35.71	42.28
42.82	36.72	43.41
56.15	26.16	58.19
41.74	30.33	90.74
54.05	30.97	74.57
59.17	31.44	43.84
47.5	28.41	65.97
36.07	32.15	49.78
51	32.17	51.34
41.7	31.4	53.63
40.87	27.69	42.01
		32.93
		39.6
		42.97
		35.96
		53.02
		51.67
		68.89
		79.34
		61.48
		78.27
		81.35
