# Supplementary material for: Editing of endogenous tubulins reveals varying effects of tubulin posttranslational modifications on axonal growth and regeneration
Source: eLife. 2024 Jul 1;13:RP94583. doi: 10.7554/eLife.94583 (PMC11216746; doi:10.7554/eLife.94583)
Supplement: Figure 1—source data 1. [file elife-94583-fig1-data1.xlsx]

## Sheet: Figure 1B-E, I
Figure 1B					Figure 1C					Figure 1D					Figure 1E					Figure 1I
WT	mec-7(S172A)	mec-7(S172E)	mec-7(S172P)		WT	mec-7(S172A)	mec-7(S172E)	mec-7(S172P)		WT	mec-7(S172A)	mec-7(S172E)	mec-7(S172P)		WT	mec-7(S172A)	mec-7(S172E)	mec-7(S172P)		WT	mec-7(S172A)	mec-7(S172E)
34.9	43.9	142.52	102		155.21	-47.94	-239.07	17.83		1.52	60.31	10.13	10.05		85.07	89.45	16.56	67.78		17.91	29.64	3.83
32.9	57.9	117.44	134.74		132.41	11.29	-253.85	52.13		2.28	59.74	15.23	13.37		89.97	80.34	22.42	31.56		43.26	39.79	0
33.23	80.64	219.72	132.96		126.03	7.41	-173.06	18.42		0.58	36.97	4.26	7.07		94.87	90.45	22.41	38.34		36.93	36	4.51
37.33	56.03	212.28	100.23		98.65	-13.89	-243.41	41.94		7.42	46.58	9.56	3.7		91.65	90.34	39.97	35.58		28.99	36.5	2.74
39.06	55.51	117.02	82.24		111.33	-10.37	-120.45	48.39		1.2	127.82	10.45	9.56		92.21	89.34	31.11	28.5		32.35	21.64	2.49
45.1	55.87	224.93	85.31		118.64	33.41	-132.07	36.35		0	36.98	7.76	14.62		82.29	98.34	24.03	41.7		20.74	37.58	0
38.32	69.44	155.01	57.83		85.87	1.51	-193.17	1.27		11.97	53.57	13.26	1.82		85.2	100.34	19.22	51.62		51.41	19.66	3.84
39.68	42.99	256.14	72.24		78.5	37.89	-158.41	46.37		7.58	44.84	7.6	10.27		93.75	84.56	28.31	32.53		61.36	43.23	4.27
46.01	34.23	235.09	133.5		108.12	-3.24	-268.19	39.45		4.43	38.29	5.8	24.86		86.26	98.54	15.85	36.08		4.84	13.42	0
40.53	48.21	133.58	138.2		104.24	17.97	-305.45	31.11		3.49	73.38	5.05	9.68		97.53	80.43	19.54	39.3		66.58	15.75	0
50.44	63.51	312.54	84		86.35	-24.75	-324.26	25		0.97	47.58	12.47	9.15		98.29	79.4	23.36	14.19		7.26	21.74	3.17
45.95	53.77	275.76	128.88		107.39	-54.63	-398.55	-15.19		5.25	59.23	5.16	5.93		78.2	67.3	14.3	44.36		30.88	43.51	6.34
39.58	67.84	117.45	133.79		72.9	14.23	-56.24	29.77		11.88	24.68	21.32	0.89		86.53	89.3	22.77	69.09		65.01	24.68	6.71
47.19	70.73	209.9	139.32		93.2	33.51	-132.07	20.45		6.26	39.71	11.25	8.58		86.91	84.32	26	39.87		6.97	35.53	7.8
35.71	63.06	177.15	111.01		114.99	-3.19	-251.58	15.98		17.38	42.16	12.51	8.68		95.42	94.32	7.64	37.9		27.49	24.23	4.18
39.24	62.92	221.28	94.24		64.34	34.48	-250.57	82.7		11.08	35.12	16.93	1.69		87.61	78.34	32.78	43.46		13.22	29.88	8.94
39.1	65.44	274.59	124.1		102.86	15.92	-284.06	33.65		3.3	37.8	7.31	14.17		82.5	80.54	33.21	41.01		26.49	8.06	5.85
46.61	57.47	178	133.51		35.99	-11.53	-290.01	79.37		4.68	39.84	9.46	8.74		82.46	78.34	20.82	35.78		13.27	32.57	8.67
53.52	97.86	256.13	120.97		87.75	-3.81	-217.95	21.58		2.71	30.78	4.75	10.09		98.92	90.32	24.78	34.33		55.34	41.9	18.16
61.62	57.27	110.53	148.6		151.88	-32.94	-242.24	31.38		3.14	38.16	10.85	1.44		86.15	78.3	22.02	41.44		23.27	23.92	3.34
50.52	67.06	115.27	126.02		120.02	0	-237.88	56.26		4.38	56.78	19.24	13.51		77.25	89.4	5.23	56.16		21.61	19.5	3.6
44.84	76.13	158.89	61.42		53.87	0	-254.04	-25.92		0	60.79	6.96	7.13		92.86	80.54	18.57	36.81		18.1	21.76	2.22
49.47	96.81	132.17	141.32		102.32	29.42	-227.14	33.74		0	20.85	12.95	9.56		80.41	89.43	20.46	33.59		23.13	38.84	5.06
44.19	79.14	131.26	143.83		118.05	0	-232.65	23.36		5.35	55.22	0	9.16		70.88	78.43	29.39	40.41		42.49	34.66	1.5
46.49	109.91	222.61	117.74		82.41	9.22	-273.45	55.69		21.65	38.48	26.15	7.38		70.23	70.3	24.28	47.05		67.89	54.08	9.61
45.23	46.96	245.21	126.2		111.84	-1.24	-239.41	-19.01		6.72	41.28	4.74	14.79		91.04	78.43	35.46	39.97		71.29	23.77	0
56.01	49.03	126.26	123.15		154.34	3.28	-238.12	29.61		5.82	78.58	6.58	9.18		80.09	83.45	15.28	33.88		46.58	37.82	0
40.83	43.11	176.97	131.44		114.28	-13.19	-220.12	180.89		12.74	46.81	6.74	12.9		58.93	68.43	21.35	29.57		25.56	59.63	1.77
22.48	54.45	185.33	123.61		88.05	-23.35	-148.78	7.8		24.62	66.83	6.29	19.74		84.72	78.43	27.48	41.46		40.13	7.45	2.71
39.88	31.97	109.36	152.33		126.48	-46.19	-142.21	37.08		0	35.19	3.74	9.09		94.85	89.3	33.79	40.06		59.37	52.64	3.21
52.01	46.14	147.54	94.75		137.13	-28.76	-251.16	4.74		8.72	38.42	5.28	8.36		74.31	74.54	22.73	34.36		62.09	60.95	8.37
50.27	46.91	135.96	119.66		47.46	-78.44	-223.62	-40.47		3.83	79.41	3.67	6.69		79.6	89.34	30.5	36.26		48.23	25.67	5.63
47.54	49.03	183.99	127.7		90.49	-26.41	-195.32	-19.15		15.01	44.82	12.27	7.53		93.18	78.54	20.63	47.96		13.78	18.39	7.89
49.26	53.91	107.08	182.69		153.25	-17.34	-275.02	-8.56		21.01	43.52	10.4	6.28		98.6	78.32	30.05	38.91		7.46	57.99	4.89
50.93	63.04	124.89	89.32		171.12	0	-249.42	26.19		7.42	30.73	0	7.54		80.88	67.49	23.93	37.03		53.61	20.23	5.46
57.92	73.13	193.2	99.26		153.62	-3.88	-105.83	22.8		0	25.59	12.84			88.68	69.43	18.78	62.67		47.43	25.2	12.18
38.35	100.77	123.92	125.38		89.13	-35.1	-81.05	-20.69		4.55	97.63	9.33			89.75	70.32	17.17	66.83		22.71	11.87	11.63
31.31	55.68	140.7	132.76		28.84	0	-212.56	4.59		0	61.4	27.35			71.39	78.32	20.99	68.67		12.82	26.58	8.95
39.01	66.31	133.32	134.88		80.32	-24.93	-76.96	-46.11		12.11	54.91	6.42			80.54	78.09	16.16	48.53		88.91	37.97	4.78
41.06	40.04	123.78	130.18		58.26	6.58	-212.79	37.37		1.73	48.89	10.56			91.49	80.43	21.44	61.96		18.76	38.3	6.23
42.21	40.37	116.89	136.03		86.54	-10.17		39.38		4.35	60.94	8.21			77.17	85.65	35.24	16.06		20.75	16.44	3.66
39.68	43.17	177.11	87.54		125.98					3.35	37.33	8.69			88.29	75.98	22.25	20.8		78.32	25.58	0
33.27		136.17	96.26		111.05					0	63.8					60.5	24.69	28.07		27.6	15.44	0
54.2					95.98					3.83	45.37							21.97		28.14	8.23	5.95
44.32					99.77					12.61	39.67							56.15		27.2	15.55	1.86
22.24										0	55.08							55.8		20.76	14	3.48
13.73										5.13	59.28							38.95		87.94	27.43	5.63
										3.72	31.76							43.04		42.41	36.32	1.38
										6.35	17.26									19.21	7.19	8.15
											29.43									10.2	57.5	14.38
											65.06									33.64	43.47	4.42
											64.67									8.55	16.79	2.1
											24.01									16.68	48.53	4.85
											55.74									71.69	9.94	7.81
																				11.73	50.76	1.33
																				62.13	42.33	0
																				56.9	17.73	4.51
																				10.6	39.22	1.29
																				25.77	38.24
																				84.39	10.47
																				22.39	62.43
																				12.8	13.57
																				25.78	18.12
																				50.63	25.81
																				14.37	31.6
																				34.63
																				76.06
																				47.62
																				20.08
