# Supplementary material for: Editing of endogenous tubulins reveals varying effects of tubulin posttranslational modifications on axonal growth and regeneration
Source: eLife. 2024 Jul 1;13:RP94583. doi: 10.7554/eLife.94583 (PMC11216746; doi:10.7554/eLife.94583)
Supplement: Figure 2—source data 1. [file elife-94583-fig2-data1.xlsx]

## Sheet: Figure 2
Figure 2B					Figure 2C - anterograde % (x100)					Figure 2F				Figure 2H						Figure 2J
WT	mec-7(S172E)	WT Col_treated	mec-7(S172A) treated		WT	mec-7(S172E)	WT Col_treated	mec-7(S172A) treated		WT	mec-7(S172E)	mec-7(S172A)		WT	mec-7(S172A)	mec-7(S172E)	mec-7(S172P)	mec-7(ok2152)		WT	dlk-1(ju476)	mec-7(S172A)	mec-7(S172E)
0	15	9	0		1	0.333333	1	1		8	6	10		10	8	4	6	3		95.76	28.08	35.92	34.35
15	16	5	6		1	0.684932	0.8	1		8	8	12		8	8	6	6	4		112.35	36.01	90.02	24.01
17	49	20	1		0.826446	0.429185	1	1		6	9	15		8	10	5	1	3		49.72	28.58	46.44	28.48
0	25	8	15		1	0.757576	1	1		8	4	9		8	9	3	3	3		72.32	22.69	40.76	29.23
5	15	9	0		0.8	0.598802	1	1		7	5	15		7	10	2	3	2		56.53	28.01	40.6	14.03
1	14	31	6		1	0.5	1	0.666667		9	0	12		10	8	6	4	3		66.04	20.79	47.59	30.46
1	16	6	7		0.5	0.75188	1	0.854701		9	10	8		8	9	3	5	3		88.93	54.83	47.6	10.29
6	27	14	1		1	0.591716	1	1		7	6	7		7	9	3	3	3		39.4	21.61	46.95	33.26
11	18	22	6		1	0.775194	1	1		11	9	13		9	9	2	3	1		64.87	28.48	56.02	17.65
2	24	14	2		1	0.584795	0.787402	1		5	12	9		9	7	1	5	4		70.06	22.05	83.71	19.34
0	10	19	6		1	0.2	1	1		8	5	10		8	10	4	2	3		67.05	28.95	36.5	34.91
2	32	16	13		1	0.561798	1	1		8	6	15		9	10	2	3	3		93.93	17.44	72.85	24.05
15		7	0		1		1	1		10	4	14		10	8	4	5	6		104.06	28.08	61.2	22.33
0		11	1		1		0.909091	1		6	6	13		10	8	3	4	4		37.72	22.67	58.45	9.32
14		29	3		1		0.892857	1		8	7	13		9	7	2	3	3		81.18	14.57	17.96	9.97
6			5		1			1		7	7	13								61.77	12.8	43.36	7.45
										10	4	12								104.92	26.89	43.49	9.75
										9	5	14								62.93	16.13	83.5	39.48
										13	5	13								126.64	30.24	36.18	24.07
										10	10	10								101.16	50.49	39.98	28.74
										6	12	14								133.25	16.7	20.76	55.11
										7	3	16									63.13	20.21	11.65
										7	13	8									23.88	63.9
										7	6	10									23.89	26.5
										9	5	8									14.78	33.55
										8	6	11									29.56	37.44
										9	7	17									51.3	37.73
										10	4	13									33.83	47.29
										10	6	6									80.56
										8	8	16									23.45
											5	15									17.6
												12									49.03
																					18.82
																					37.26
