# Supplementary material for: Editing of endogenous tubulins reveals varying effects of tubulin posttranslational modifications on axonal growth and regeneration
Source: eLife. 2024 Jul 1;13:RP94583. doi: 10.7554/eLife.94583 (PMC11216746; doi:10.7554/eLife.94583)
Supplement: Figure 3—figure supplement 1—source data 1. [file elife-94583-fig3-figsupp1-data1.xlsx]

## Sheet: Figure 3 - figure supplement 1
1D. ALM-PN length (um)
WT	mbk-1(pk1389)	mbk-1(ok401)	mbk-2(ok2235)	mbk-1(pk1389); mbk-2(ok2235)	mbk-1(pk1389); mbk-2(ne992)	mbk-1(pk1389); mbk-2(dd5)	mbk-1(pk1389); eri-1	mbk-1(-); eri-1; mbk-2(feeding RNAi)	mbk-1(-);mbk-2(TRN RNAi against gDNA)	mbk-1(-);mbk-2(TRN RNAi against cDNA)	hpk-1(pk1393)	hpk-1(-);mbk-2(TRN RNAi agaisnt gDNA)	hpk-1(-);mbk-2(TRN RNAi against cDNA)
1.52	0	4.69	0	0.5	29.47	0	0	7.18	1.77	0	0.38	0	2.6
2.28	1.57	1.29	0	0	0	1.55	3.46	1.93	3.66	2.5	25.9	3.69	3.88
0.58	4.14	8.6	0	1.5	0	0	3.32	2.25	5.35	2.06	1.07	1.7	0
7.42	2.48	8.86	0.64	2	4.5	2.14	2.05	5.58	1.69	4.21	2.86	5.31	10.85
1.2	1	3.51	1.79	0	3.8	0	2.46	3.24	0.5	4.14	0	4.01	7.42
0	3.39	10.81	0	0	0	2.36	3.32	1.07	0.5	0	0	4.91	7.49
11.97	1.41	3.33	0	0	8.35	0	4.43	1.89	2.76	0	1.95	0	0
7.58	2.23	3.8	0	0	0	2.86	7.58	3.65	0.5	2.24	0	1.62	16.36
4.43	3.92	5.21	0	0	0	0	5.34	16.13	0.5	2.98	3.9	1.54	3.07
3.49	4.16	0	0.56	1.02	5.74	0	0.5	0	3.57	2.58	4.04		0
0.97	5.82	0	0	0	3.04	0	13.57	7.02	5.34	5.33	2.15		3.86
5.25	1.39	0	1.3	0.99	0	0	3.21	5.92		1.23	5.1		28.47
11.88	2.73	0	1.3	0	4.5	0	2.04	1.63		0	1.95		5.35
6.26	0	2.35			7.56	0	3.46	1.74		5	0		2.97
17.38					1.95	0		4.18			3.14		0
11.08					0	0		0			0		0
3.3					0	1.2		0			5.8		2.96
4.68					0	0		3.19			3.2		3.41
2.71					0	1.46		0			0		0
3.14					0	0		1.66			1.2		0
4.38					0	0		1.04			14.8
0					2.74	2.74		9.19			0.3
0					19.39	1.2		1.46			0
5.35					2	13.23		4.43			0
21.65					0	1.3		5.83			0
6.72					0	0		0			16.38
5.82					0	0		20.29			0
12.74					6.09	0		5.41			0
24.62					0	3.25		2.26
0					2.5	0		2.68
8.72					1.2	5.69		1.69
3.83					1.2	6.04		3.29
15.01					0	7.36		7.93
21.01					0	4.66		0
7.42						0		7.9
0						1.2		0
4.55								2.52
0								4.75
12.11								1.99
1.73
4.35
3.35
0
3.83
12.61
0
5.13
3.72
6.35
