# Supplementary material for: Editing of endogenous tubulins reveals varying effects of tubulin posttranslational modifications on axonal growth and regeneration
Source: eLife. 2024 Jul 1;13:RP94583. doi: 10.7554/eLife.94583 (PMC11216746; doi:10.7554/eLife.94583)
Supplement: Figure 3—figure supplement 2—source data 1. [file elife-94583-fig3-figsupp2-data1.xlsx]

## Sheet: Figure 3 - figure supplement 2
2C. ALM-PN length
WT	mbk-2::gfp	mbk-2::gfp; TRN::antiGFP-ZIF1	mec-7(S172A)
1.52	4.56	26.06	60.31
2.28	10.19	7.35	59.74
0.58	24.88	11.22	36.97
7.42	7.36	16.32	46.58
1.2	9.3	26.78	127.82
0	26.51	6.87	36.98
11.97	46.36	6	53.57
7.58	8.01	24.06	44.84
4.43	17.83	23.9	38.29
3.49	8.73	2.25	73.38
0.97	15.63	7.27	47.58
5.25	15.14	24.84	59.23
11.88	18.68	12.14	24.68
6.26	12.2	4.84	39.71
17.38	19.83	3.91	42.16
11.08	7.53	8.92	35.12
3.3	17.65	19.69	37.8
4.68	8.24	25.28	39.84
2.71	12.63	7.89	30.78
3.14	8.41	10.2	38.16
4.38	8.47	14.7	56.78
0	8.91	2.93	60.79
0	5.96	11.72	20.85
5.35	6.33	3.57	55.22
21.65	20.1	13.87	38.48
6.72	7.34	9.25	41.28
5.82	5.47	29.5	78.58
12.74	8.01	8.09	46.81
24.62	16.33	7.52	66.83
0	16.21	12.61	35.19
8.72	7.95	15.25	38.42
3.83		6.54	79.41
15.01		15.94	44.82
21.01			43.52
7.42			30.73
0			25.59
4.55			97.63
0			61.4
12.11			54.91
1.73			48.89
4.35			60.94
3.35			37.33
0			63.8
3.83			45.37
12.61			39.67
0			55.08
5.13			59.28
3.72			31.76
6.35			17.26
			29.43
			65.06
			64.67
			24.01
			55.74
