# Supplementary material for: Editing of endogenous tubulins reveals varying effects of tubulin posttranslational modifications on axonal growth and regeneration
Source: eLife. 2024 Jul 1;13:RP94583. doi: 10.7554/eLife.94583 (PMC11216746; doi:10.7554/eLife.94583)
Supplement: Figure 3—source data 1. [file elife-94583-fig3-data1.xlsx]

## Sheet: Figure 3B-D, F
Figure 3B					Figure 3C					Figure 3D				Figure 3F
WT	cdk-1(he5)/+	cdk-1(he5)	cdk-1(ok1882)		WT	cdk-1(he5)/+	cdk-1(he5)	mec-7(S172A)		mec-7(S172A)	cdk-1(he5)/+; mec-7(S172A)	cdk-1(he5);S172A		Lane 1	Lane 2	Lane 4	Lane 6
2.13	9.59	27.33	33.59		0.00474187	0.0202924	0.063536	0.0970906		60.31	61.61	42.07		0.172474	0.0601504	2.05714	0.120115
18.07	15.2	34.97	45.98		0.041821	0.0323983	0.0957531	0.131831		59.74	97.2	53.67
11.12	10.39	40.65	21.85		0.0242646	0.0220071	0.100604	0.0883357		36.97	55.58	39.65
6.71	4.71	36.04	30.57		0.0145307	0.00906327	0.113148	0.01527		46.58	40.83	29.16
4.02	25.55	39.66	12.55		0.00933473	0.0509858	0.0901589	0.116544		127.82	39.76	33.51
6.38	7.17	26.35	42.72		0.0134633	0.0128681	0.0680474	0.100316		36.98	66.01	44.36
4.49	4.41	30.06	25.26		0.0106651	0.0082356	0.0894643	0.0355668		53.57	20.6	26.06
6.77	5.02	36.89	11.4		0.0136409	0.00990451	0.0967023	0.130196		44.84	43.97	68.47
11.78	3.9	32.73	32.25		0.0283972	0.00944104	0.0849071	0.0620276		38.29	20.18	47.74
16.3	9.35	14.16	28.23		0.037907	0.0192158	0.0351391	0.0548473		73.38	60.62	47.28
10.56	3.65	28.05	20.73		0.0219977	0.00742912	0.0702216	0.143799		47.58	64.34	31.23
10	5.31	6.51	25.57		0.0239481	0.0105294	0.0182327	0.0922283		59.23	30.35	20.64
4.46	3.72	29.88	22.03		0.0110464	0.0078872	0.0747766	0.0323328		24.68	26.37	73.18
11.42	7.69	21.61	41.11		0.0251858	0.0173085	0.0580571	0.11896		39.71	32.54	35.12
1.86	18.16	8	40.26		0.00400724	0.0367433	0.0192391	0.125115		42.16	61.33	54.93
22.4	3.07	21.6	28.46		0.052696	0.00680227	0.0594517	0.0947893		35.12	56.46	65.23
5.24	4.63	18.27	18.01		0.0115538	0.00953892	0.0544999	0.104468		37.8	30.16	51.9
3.74	6.72	34.92	16.47		0.00877358	0.0175292	0.104887	0.105835		39.84	90.77	69.65
7.36	10.74	36.81	36.27		0.0152615	0.0214929	0.106906	0.0978548		30.78	40.2	27.35
3.27	4.47	26.36	30.55			0.00931774	0.0643838	0.10031		38.16	46.74	29.97
	1.97	36.15	32.49			0.00433358	0.0862131	0.1337		56.78	30.56	28.84
	1.93		40.34			0.00400008		0.100867		60.79	36.68	41.55
								0.150947		20.85	42.97	29.97
								0.152697		55.22	56.88	49.79
								0.127027		38.48	43.2	38.17
								0.138108		41.28	49.51	45.58
										78.58	75.95	26.57
										46.81	39.3	44.93
										66.83	92.3	22.13
										35.19	34.14	69.33
										38.42	45.75	26.08
										79.41	51.92	34.83
										44.82	50.1	42.81
										43.52	27.49	32.29
										30.73	87.74	33.16
										25.59	59.52	34.1
										97.63	28.38	40.9
										61.4	22.64	28.58
										54.91	30.17	28.23
										48.89	35.42	40.17
										60.94	53.82	93.91
