# Supplementary material for: Editing of endogenous tubulins reveals varying effects of tubulin posttranslational modifications on axonal growth and regeneration
Source: eLife. 2024 Jul 1;13:RP94583. doi: 10.7554/eLife.94583 (PMC11216746; doi:10.7554/eLife.94583)
Supplement: Figure 4—source data 1. [file elife-94583-fig4-data1.xlsx]

## Sheet: Figure 4A-B, D-E, G-H, J
Figure 4A				Figure 4B				Figure 4D				Figure 4E						Figure 4G				Figure 4H % of TRNs					Figure 4J ALM-AN				Figure 4J PLM-AN				Figure 4J PLM-PN
WT	mec-12(K40Q)	mec-12(K40R)		WT	mec-12(K40Q)	mec-12(K40R)		WT	mec-12(K40Q)	mec-12(K40R)		WT	mec-17(ok2109)	mec-17(dW)	mec-12(K40R)	mec-12(K40Q)		WT	mec-17(ok2109)	mec-17(dW)			WT	mec-17(-)	mec-17(dW)		WT	mec-7(K252Q)	mec-7(K252R)		WT	mec-7(K252Q)	mec-7(K252R)		WT	mec-7(K252Q)	mec-7(K252R)
85.07	62.44	88.2		1.52	4.84	1.87		95.76	61.31	17.01		10	4	10	10	9		1.52	103.63	19.91		Severe Swelling	0	53	30.1		34.9	114.33	154.29		155.21	-284.03	-354.25		85.07	25.86	2.16
89.97	94.6	88.77		2.28	10.85	25.76		112.35	44.93	34.19		8	5	10	8	8		2.28	42.68	2.58			0	50	28		32.9	127.51	327.62		132.41	-38.93	-255.39		89.97	16.55	16.37
94.87	70.13	84.74		0.58	2.3	6.01		49.72	45.65	91.98		8	5	8	10	10		0.58	103.22	9.15					25		33.23	90.03	232.53		126.03	-55.95	-289.27		94.87	29.08	13.64
91.65	77.06	83.52		7.42	2.78	3.6		72.32	69.07	90.7		8	1	7	9	9		7.42	10.35	40.52		Partial Swelling	0	47	40.4		37.33	88.14	259.13		98.65	-63.13	-284.26		91.65	20.81	30.82
92.21	78.08	79.85		1.2	2.88	6.13		56.53	45.63	25.64		7	4	6	9	8		1.2	72.91	61.48			0	50	40		39.06	113.38	253.81		111.33	-77.05	-243.99		92.21	48.52	22.41
82.29	86.48	84.29		0	3.37	29.18		66.04	48.83	65.7		10	2	8	8	10		0	22.18	14.73					38.9		45.1	125.16	176.97		118.64	22.56	-243.38		82.29	47.04	16.47
85.2	74.9	88.17		11.97	7.04	6.31		88.93	59.47	63.62		8	3	10	9	9		11.97	12.25	11.69		No Swelling	100	0	29.5		38.32	131.39	210.49		85.87	-163.34	-361.04		85.2	2.01	17.46
93.75	93.75	83.69		7.58	2.22	11.32		39.4	50.67	82.77		7	6	10	8	8		7.58	118.16	21.91			100	0	32		39.68	123.11	294.76		78.5	-60.35	-234.73		93.75	31.51	6.46
86.26	80.66	80.75		4.43	7.18	2.81		64.87	113.6	73.22		9	5	6	8	7		4.43	4.34	31.58					36.1		46.01	119.87	282.4		108.12	-134.26	-316.35		86.26	28.62	13.12
97.53	63.75	86.23		3.49	25.14	6.07		70.06	50.14	83.37		9	0	5	7	9		3.49	53.89	56							40.53	109.96	254.74		104.24	-81.8	-220.27		97.53	21.42	19.21
98.29	79.44	91.79		0.97	4.05	25.51		67.05	24.54	60.18		8	2	7	9	8		0.97	122.29	36.81							50.44	139.26	329.71		86.35	-120.9	-291.74		98.29	23.97	15.44
78.2	86.76	106.66		5.25	4.24	14.89		93.93	52.95	98.77		9	6	7	10	10		5.25	29.87	38.12							45.95	111.18	272.01		107.39	-28.52	-311.77		78.2	16.04	17.65
86.53	76.85	104.57		11.88	23.65	9.5		104.06	63.59	31.03		10	3	9	9	7		11.88	109.34	40.54							39.58	91.45	275.64		72.9	-53.68	-330.68		86.53	28.34	34.49
86.91	56.7	79.62		6.26	3.96	22.53		37.72				10	4	9	7	7		6.26	53.24	55.84							47.19	99.92	119.23		93.2	-159.22	-213.01		86.91	40.67	20.38
95.42	56.1	83.34		17.38	3.57	12.5		81.18				9	1	10	7	8		17.38	114.71	9.41							35.71	116.91	315.06		114.99	-105.98	-353.46		95.42	28.02	14.13
87.61	47.49	89.24		11.08	3.89	6.24		61.77										11.08	30.46	66.66							39.24	88.37	318.27		64.34	-32.21	-321.64		87.61	8.49	34.75
82.5	41.52	95.37		3.3	7.82	1.54		104.92										3.3	60.14	6.1							39.1	98.24	108.84		102.86	-122.75	-319.54		82.5	25.31	39.48
82.46	74.1	97.35		4.68	5.03	3.92		62.93										4.68	14.37	14.18							46.61	88.78	134.29		35.99	-86.16	-341.08		82.46	16.06	22.02
98.92	77.23	83.06		2.71	5.03	2.83		126.64										2.71	65.52	0							53.52	115.85	113.25		87.75	-115.09	-277.74		98.92	17.71	25.14
86.15	81.84	84.69		3.14	1.29	0		101.16										3.14	4.68	48.56							61.62	105.62	134.17		151.88	33.72	-300.93		86.15	28.46	18.07
77.25	83.02	67.44		4.38	10.86	10.06		133.25										4.38	62.64	49.6							50.52	79.7	183.3		120.02	-22.16	-267.34		77.25	26.82	15.13
92.86	95.5	86.81		0	5.7	7.16												0	42.94	8.69							44.84	117.14			53.87	-61.11	-255.6		92.86	30.86	15.29
80.41	95.97	94.64		0	2.74	3.74												0	61.15	49.51							49.47	104.03			102.32	-24.5	-313.06		80.41	10.86
70.88	69.74	98.53		5.35	6.38	0												5.35	52.05	33.8							44.19	118			118.05				70.88	26.08
70.23	80.44	101.46		21.65	2.56	0												21.65	36.32	61.52							46.49				82.41				70.23	31.33
91.04	62.1	99.98		6.72	6.06	4.13												6.72	80.71	83.97							45.23				111.84				91.04
80.09	85.08	91.09		5.82	9.75	4.89												5.82	104.75	24.99							56.01				154.34				80.09
58.93	90.42	75.2		12.74	6.97	20.07												12.74	81.11	29.34							40.83				114.28				58.93
84.72	92.17	85.56		24.62	10.42	6.99												24.62	103.81	15.72							22.48				88.05				84.72
94.85	95.93	75.97		0	9.71	3.41												0		5.77							39.88				126.48				94.85
74.31	82.22	103.46		8.72	8.07	12.1												8.72		3.44							52.01				137.13				74.31
79.6	90.17	95.46		3.83	8.97	2.46												3.83		20.15							50.27				47.46				79.6
93.18	81	70.05		15.01	3.09	0												15.01		3.57							47.54				90.49				93.18
98.6	75.63	106.31		21.01	9.5	31.3												21.01		8.15							49.26				153.25				98.6
80.88	88.83	88.77		7.42	15.1	9.85												7.42		35.05							50.93				171.12				80.88
88.68	49.07	106.06		0	3.09	12.83												0		56.9							57.92				153.62				88.68
89.75	94.7	78.53		4.55	4.17	2.28												4.55		38.66							38.35				89.13				89.75
71.39	76.27	91.8		0	0	5.42												0		60.99							31.31				28.84				71.39
80.54	90.89	88.22		12.11	3.7	4.07												12.11		42.06							39.01				80.32				80.54
91.49	81.51	95.3		1.73	4.06	6.9												1.73		15.57							41.06				58.26				91.49
77.17	89.67	89.92		4.35	3.13	5.49												4.35		35.36							42.21				86.54				77.17
88.29	91.76	45.35		3.35	4.87	18.64												3.35		32.61							39.68				125.98				88.29
	87.51	73.13		0	2.56	20.53												0		27.93							33.27				111.05
	86.42	95.03		3.83	15.39	10.28												3.83		49.83							54.2				95.98
	87.44	96.53		12.61	9.88	18.82												12.61		4.79							44.32				99.77
	89.97			0	5.27	8.83												0		51.01							22.24
	93.74			5.13	4.17													5.13		5.28							13.73
	72.77			3.72	8.6													3.72		45.07
	77.72			6.35	14.53													6.35		49.63
	61.86				5.07															24.73
					4.08															17.55
					4.96
					4.67
					3.79
