# Supplementary material for: Editing of endogenous tubulins reveals varying effects of tubulin posttranslational modifications on axonal growth and regeneration
Source: eLife. 2024 Jul 1;13:RP94583. doi: 10.7554/eLife.94583 (PMC11216746; doi:10.7554/eLife.94583)
Supplement: Figure 5—figure supplement 3—source data 1. [file elife-94583-fig5-figsupp3-data1.xlsx]

## Sheet: Figure 5 - figure supplement 3
3C. # of mito::GFP puncta			3D. # of touch responses
WT	mec-12(4Es-A)		WT	mec-12(4Es-A)
8	9		10	9
8	9		8	10
6	7		10	8
8	12		8	9
7	8		9	10
9	10		10	10
9	9		8	10
7	10		9	8
11	10		9	9
5	9		9	8
8	8		8	9
8	8		9	10
10	10		8	7
6	9		10	9
8	8		9	9
7	7
10	13
9	9
13	9
10	8
6	11
7	7
7	7
7	9
9	12
8	10
9	7
10	9
10	7
8
