# Supplementary material for: Editing of endogenous tubulins reveals varying effects of tubulin posttranslational modifications on axonal growth and regeneration
Source: eLife. 2024 Jul 1;13:RP94583. doi: 10.7554/eLife.94583 (PMC11216746; doi:10.7554/eLife.94583)
Supplement: Figure 5—source data 1. [file elife-94583-fig5-data1.xlsx]

## Sheet: Figure 5B, D-E, G-H
Figure 5B										Figure 5D			Figure 5E - anterograde % (x100)			Figure 5G					Figure 5H
WT	Δ7aa	7aa-A	4Es-A	1stE-A	2Es-A	4thE-A	3Es-A	Δ3Es		WT Col_treated	mec-12(4Es-A) treated		WT Col_treated	mec-12(4Es-A) treated		WT	mec-12(4Es-A)	ttll-5(-)	ttll-5(-); mec-12(4Es-A)		WT	spas-1(tm683)	klp-7(unk179; Δ11bp)	klp-7(unk171; Δ14bp)	klp-7(unk171; Δ14bp); mec-12(4Es-A) #1	klp-7(unk171; Δ14bp); mec-12(4Es-A) #2
1.52	70.55	10.62	55.97	13.17	9.27	16.64	49.7	64.03		9	16		1	1		95.76	66.28	148.91	72.83		1.52	8.92	102.4	95.44	85.64	95.8
2.28	65.98	52.31	38.15	7.66	18.04	21.83	31.98	5.32		5	20		0.8	1		112.35	192.02	142.49	140.93		2.28	10.1	96.01	99.98	84.8	184.89
0.58	58.24	22.83	19.08	45.99	27.07	40.1	67	17.18		20	3		1	1		49.72	60.98	105.46	91.71		0.58	4.51	158.87	118.11	133.05	130.49
7.42	70.02	13.19	81.7	26.9	52.69	19.4	36.75	48.32		8	1		1	1		72.32	116.21	140.49	101.77		7.42	6.11	124.52	108.57	85.67	123.15
1.2	45.77	25.65	38.71	25.06	25.81	15.07	18.05	21.3		9	5		1	1		56.53	34.7	99.72	108.29		1.2	0	93.52	107.73	137.39	94.5
0	18.49	33.89	54.9	16.84	19.03	39.68	37.41	47.65		31	3		1	1		66.04	118.17	69.94	110.14		0	27.36	68.64	100.41	85.49	111.81
11.97	30.02	35.57	54.5	9.25	35.81	11.77	42.73	11.72		6	9		1	1		88.93	85	80.37	71.99		11.97	6.86	84.05	60.74	112.07	102.85
7.58	20.1	18.51	58.76	23.62	32.24	26.93	21.28	26.46		14	0		1	1		39.4	109.09	94.39	156.35		7.58	3.81	117.57	89.75	136.64	98.41
4.43	36.91	27.46	37.39	17.81	21.65	8.72	39.04	23.36		22	9		1	1		64.87	144.7	56.73	47.34		4.43	6.51	111.05	113.37	214.19	85.97
3.49	38.41	43.22	42.57	18.63	8.44	6.54	46.4	9.46		14	11		0.787402	1		70.06	120.34	93.88	161.99		3.49	8.07	169.61	81.47	138.71	93.97
0.97	47.1	8.3	45.02	9.93	19.13	6.76	22.91	24.8		19	11		1	1		67.05	90.91	150.82	121.8		0.97	10.25	239.14	98.24	36.64	100.1
5.25	41.35	9.24	39.48	46.56	9.29	9.62	21.92	13.15		16			1			93.93	128.01	176.72	142.48		5.25	3.82	129.36	118.57	91.52	111.51
11.88	30.5	20.38	56.23	18.21	26.06	6.17	35.67	16.7		7			1			104.06	101.42	58.67	90.7		11.88	13.38	209	72.97	118.26	94.32
6.26	58.46	25.97	74.66	22.91	3.79	38.94	22.45	11.8		11			0.909091			37.72	93.72	159.87	81.3		6.26	15.12	96.51	101	91.79	126.01
17.38	33.06	48.56	61.52	25.4	11.99	17.3	7.57	61.31		29			0.892857			81.18	136.35	152.16	98.81		17.38	4.74	85.87	77.28	95.41	97.39
11.08	57.47	27.53	44.4	38.61	60.92	11.71	42.47	67.95								61.77	66.91	187.86	102.52		11.08	6.27	104.08	90.35	132.77	121.72
3.3	69.02	24.65	57.83	38.8	3.54	26.23	41.12	7.34								104.92	92.34	67.28	87.52		3.3	14.23	129.11	122.96	136.91	124.66
4.68	46.83	21.84	39.14	28.65	5.59	20.68	23.82	16.69								62.93	38.23	26.31	79.69		4.68	6.31	107.07	238.13	215.6	91.43
2.71	46.6	53.93	20.16	17.2	21.2	34.25	17.6	31.03								126.64	188.67	174.4	141.82		2.71	5.09	75.56	97.1	68.39	81.2
3.14	33.8	41.43	69.55	31.92	43.25	20.55	45.48	38.92								101.16	75.71	123.33			3.14	3.94	69.43	121.24		110.95
4.38	32.56	49.87	27.92	34.89	14.41	10.06	11.71	4.89								133.25	118.19	45.54			4.38	6.46		95.07		132.07
0	94.55	23.48	66.88	7.48	1.85	41.58	8.8	42.56								18.71	102.84	62.15			0	9.03		104.83		123.38
0	32.89	29.48	49.89	40.14	65.27	22.87	44.39	54.01								99.95	68.39	108.02			0	3.98		106.09
5.35	51.76	23.71	46.2	32.16	21.47	46.72	26.63	29.04								97.3	130.96	75.94			5.35			104.22
21.65	46.65	48.96	22.11	8.91	19.62	13.67	23.58	32.66								129.68		95.58			21.65			118.92
6.72	34.07	44.9	52.68	22.49	4.62	15.08	16.1	25.6								94.51		99.91			6.72			109.65
5.82	51.73	57.55	21.82	68.16	47.85	11.66	15.94	24.18								73.82		61.44			5.82			123.57
12.74	21.85	44.5	20.88	16.41	88.24	21.46	27.04	30.65								59.48		108.54			12.74			110.87
24.62	59.3	38.13	28.84	15.59	32.81	7.42	37.47	27.68								42.22		103.2			24.62			68.3
0	17.02	54.22	65.83	31.9	27.89	3.58	49.88	37.5								79.51		108.48			0			140.48
8.72	24.7	36.18	47.46	27.77	25.05	17.42	53.42									77.14		64.77			8.72			132.45
3.83	51.76	31.44	62.36	40.17	40.31	4.61	40.45									143.32		182.46			3.83			101.11
15.01	51.73	10.16	40.55	27.41	39.12	30.13	32.35									61.42		145.73			15.01			86.94
21.01	73.8	0.58	31.43	59.24	8.7	14.87	10.2									94.5		105.71			21.01
7.42	54.54	23.74	27.41	14.6		33.62	37.19									31.83		186.3			7.42
0	63.01	40.33	66.13	9.43		14.85	24.68									112.65					0
4.55	61.55	7.65	35.7	15.73		21.92	23.65									128.91					4.55
0	92.64	40.92	41.11	5.88		9.49	27.94									68.56					0
12.11	88.09	43.58	56.89	2.7		31.35	57.26									109.03					12.11
1.73	31.19	33.49	16.81	46.74		7.4	16.21									67.49					1.73
4.35	52.23	27.79	70.54	19.16		29.56	15.22									52.82					4.35
3.35	37.38	50.04	50.48	20.85		7.99	50.18									47.95					3.35
0		30.48	55.94	43.04		19.24	75.41									117.88					0
3.83		43.96	80.24	18.71		48.28	22.01									63.04					3.83
12.61		53.51		57.05		34.55	60														12.61
0				13.79		27.91	46.13														0
5.13						29.37															5.13
3.72						18.78															3.72
6.35						27.35															6.35
						19.88
						45.36
