# Supplementary material for: Editing of endogenous tubulins reveals varying effects of tubulin posttranslational modifications on axonal growth and regeneration
Source: eLife. 2024 Jul 1;13:RP94583. doi: 10.7554/eLife.94583 (PMC11216746; doi:10.7554/eLife.94583)
Supplement: Figure 6—source data 1. [file elife-94583-fig6-data1.xlsx]

## Sheet: Figure 6C-F
Figure 6C						Figure 6D						Figure 6E				Figure 6F
WT	mec-12(4Es-A)	mec-7(3Es-A); mec-12(4Es-A)	ttll-4,5,12(-)	ttll-4,5,9,12,15(-)		WT	mec-12(4Es-A)	mec-7(3Es-A); mec-12(4Es-A)	ttll-4,5,12(-)	ttll-4,5,9,12,15(-)			ALM	PLM		WT	mec-7(3Es-A)	mec-12(4Es-A)	mec-7(3Es-A); mec-12(4Es-A)	ttll-4,5,12(-)	ttll-4,5,9,12,15(-)	ttll-4,5,9,11,12,15(-)
151.88	96.41	148.59	291.215	338.095		1173.21	1563.73	3356.16	371.215	148.785		ttll-4	5.066	3.009		1.52	10.74	55.97	82.09	8.63	1.81	3.45
79.79	139.43	32.995	195.4	268.705		1524.73	1395.04	4598.27	172.69	115.155		ttll-5	11.683	17.014		2.28	6.82	38.15	52.83	1.33	1.99	4.44
87.765	176.25	18.355	26.275	74.545		1253.31	1572.1	3992.47	204.405	150.275		ttll-9	0	0.718		0.58	3.19	19.08	62.7	9.48	2.38	5.65
180.96	130.97	33.28	151.525	155.865		1412.01	2145.97	1925.13	175.865	131.685		ttll-11	0	0		7.42	3.39	81.7	51.59	0	5.61	19.84
117.645	90.62	42.025	360.39	206.49		1096.14	1505.72	1524.29	165.05	76.51		ttll-12	193.327	62.057		1.2	7.8	38.71	35.5	4.38	6.45	3.63
64.52	173.99	83.425	66.03	264.59		2056.64	1896.94	1248.38	179.54	133.24		ttll-15	0	0		0	0	54.9	73.19	0	4.37	3.34
96.925	206.515	2.095	118.675	190.115		2105.12	1446.38	1973.68	132.465	200.285						11.97	16.48	54.5	66.21	5.76	4.31	2.1
129.915	106.36	20.95	126.705	160.3		1382.27	1435.09	908.7	123.385	125.07						7.58	5.32	58.76	81.84	17.66	11.34	0
216.465	64.225	9.01	173.605	231.015		2159.93	2572.62	3039.55	150.885	135.395						4.43	7.44	37.39	72.94	9.79	10.15	0
150.7	91.725	27.955	129.055	220.29		1953.32	1575.87	2225.51	100.565	150.39						3.49	0	42.57	80.52	7.99	3.8	0
151.19	71.585	4.015	117.445	242.265		1523.41	1677.38	3064.96	125.645	173.365						0.97	2.41	45.02	82.41	16.92	10.18	4.26
97.59	52.03	96.26	167.835	337.205		2328.65	1596	4683.3	85.18	218.115						5.25	0	39.48	35.16	6.12	16.05	0
142.07	152.485	23.18	271.945	227.85		2085.99	2148.3	2974.18	167.16	110.42						11.88	2.66	56.23	44.08	0	6.61	2.72
82.685	173.55	7.765	203.64	367.435		1529.14	2701.66	1428.34	214.26	291.695						6.26	4.49	74.66	70.34	5.54	4.88	0
88.625	81.98	79.62	115.44	157.445		1838.89	2635.04	1737.3	278.315	123.895						17.38	2.5	61.52	61.44	0	9.71	0
160.93	22.4	206.96	418.54	268.19		1307.38	2773.19	3385.28	111.615	100.895						11.08	4.98	44.4	16.05	2.5	16.76	0
217.235	136.52	202.945	212.225	177.755		2955.49	1779.61	3563.01	127.44	239.315						3.3	0	57.83	2	2.47	3.59	2.76
339.685	125.1	6.375	251	385.895		2516.18	2533.89	1683.7	118.45	252.58						4.68	6.52	39.14	69.73	7.03	10.76	2.25
143.835	72.935	49.275	65.765	182.91		1625.42	1613.3	1345.93	118.25	172.96						2.71	7.45	20.16	57.93	3.36	1.69	0
206.78	55.13	39.36	89.175	420.53		1784.77	2081.81	1429.8	169.575	228.64						3.14	0	69.55	38.68	9.66	7.31	6.93
132.07	76.77	30.835	111.63	324.22		1638.39	1843.46	1710.44	135.925	106.585						4.38	0	27.92	17	10.35	0	0
242.675	161.295	45.35	412.4	142.935		2320.26	1630.15	2022.54	165.115	286.045						0	2.89	66.88	85.77	3.65	6.5	7.06
54.905	65.835	0	96.05	535.075		1564.59	1875.23	3729.09	120.67	101.91						0	0.96	49.89	62.03	9.04	5.9	14.98
131.725	68.13	26.915	167.435	160.61		1787.49	2194.99	1696.82	98.59	159.725						5.35	1.21	46.2	49.79	8.55	0	0
260.535	118.915	81.795	217.555	367.125		1924.55	2356.34	4496.77	143.55	222.47						21.65	0	22.11	36.63	1.25	4.8	5.53
101.84	151.605	20.09	303.315	307.22		1422.7	2374.07	1540.82	165.84	212.01						6.72	3.49	52.68	48.12	32.47	0	6.49
244.69	15.565	34.175	43	604.17		1466.51	1997.46	3050.74	167.305	104.495						5.82	15.52	21.82	42.13	5.49		10.91
139.275	65.73	38.635	202.3	619.415		1036.89	1718.36	3009.81	106.5	224.645						12.74	3.02	20.88	48.35	15.13
188.775	109.7	70.475	209.42	263.355		1479.27	1779.01	2378.12	94.42	137.275						24.62	1.04	28.84	39.17	13.17
125.49	62.385	44.83	165.39	325.935		1961.54	1151.72	2642.88	191.29	204.185						0	0	65.83	28.52	0
50.265	54.895	183.85	282.29	269.79		1773.31	1293.11	4028.01	141.585	163.17						8.72	0	47.46	52.31
303.41	11.425	109.625	135.655	485.875		1646.39	1186.83	1910.62	177.165	186.48						3.83	0	62.36	32.14
213.21	132.26	14.31	239.33	134.45		2319.54	1662.73	3888.09	192.35	155.975						15.01	0	40.55	19.15
215.54	42.78	60.975	42.39	225.68		1601.31	1687.92	2310.91	77.785	181.495						21.01	1.04	31.43	47.82
195.745	21.22	120.665	114.88	135.305		1759.3	1617.72	1124.55	192.395	174.505						7.42	8.31	27.41	18.01
168.075	176.135	1.145	120.575	532.975		2165.7	1772.01	2515.72	247.675	201.27						0	5.35	66.13	33.81
188.945	82.11	26.785	276.645	339.625			1980.64	1430.71	141.675	134.77						4.55	0	35.7	31.71
270.645	41.4	12.375	190.88	482.66		1901.08	1977.84	960.425	75.32							0	5.48	41.11	23.38
340.87	14.885	0	155.505	458.72		911.23	1683.6	828.21	90.665							12.11	7.27	56.89	12.77
169.56	81.515	21.485	229.185			1366.16	1004.45									1.73	4.37	16.81	10.01
157.345	137.49	18.79	198.655			2200.61	1009.54									4.35	4.45	70.54	38.91
338.615	139.605		191.955			1340.89	1673.52									3.35	7.93	50.48	66.15
183.83	122.875		71.975			2215.49	2459.22									0	12.9	55.94	35.71
117.56	207.67		176.86			1843.43	1632.09									3.83	11.72	80.24
69.64	98.25		140.63			1411.27	1328.48									12.61	3.82
49.165	19.515		163.845			1254.21	1930.88									0	7.33
178.915	94.94					1166.16	1845.71									5.13	4.05
56.4	121.125					1154.58	2125.53									3.72	19.65
131.44	93.405					1092.57	2055.61									6.35	12.91
75.935	93.735					1306.98	1741.96										5.85
66.03	106.93					1154.46	1556.69										3.78
78.84	50.165					1663.67	956.525										4.09
118.105	42.33					1023.61	1555.51										16.68
157.91	29.26					1747.68	1348.22										3.78
129.39						1759.97											2.98
103.345						1170.38											3.57
54.715						1400.18
118.725						2073.78
202.37						1489.63
32.38						949.63
95.185						1045.73
94.82						1530.15
263.77						2196.05
334.7						1450.8
142.41						1725.58
321.025						879.165
228.975						1384.12
446.38						1043.59
132.315						1286.37
36.34						1463.48
164.295						1449.66
40.775						1298.51
43.21						1939.09
256.845						2397.32
99.495						1263.6
25.995						1552.09
322.855						1127.29
138.43						1398.22
