# Supplementary material for: Editing of endogenous tubulins reveals varying effects of tubulin posttranslational modifications on axonal growth and regeneration
Source: eLife. 2024 Jul 1;13:RP94583. doi: 10.7554/eLife.94583 (PMC11216746; doi:10.7554/eLife.94583)
Supplement: Figure 7—source data 1. [file elife-94583-fig7-data1.xlsx]

## Sheet: Figure 7A, D
Figure 7A							Figure 7D
WT	ΔY	Y-A	ΔEY	ΔEE	ΔEE&EY		WT	mec-12(ΔY)	mec-12(Y-A)	mec-12(ΔEY)
1.52	20.68	10.91	10.83	17.57	16.48		6555	36350	13798	5322
2.28	15.02	2.49	5.42	4.81	40.79		15113	34916	45711	2820
0.58	6.27	7.47	19.46	24.93	15.93		32765	18890	13216	3491
7.42	17.42	25.46	12.87	12.45	59.93		2405	7671	6646	2729
1.2	7.18	22.1	11.38	21.01	24.47		7768	4461	5744	3737
0	14.94	9.58	10.12	12.24	27.1		5870	21839	19932	3120
11.97	11.11	22.47	15.72	15.88	38.85		9852	38243	41668	1823
7.58	0.26	19.5	8.82	22.4	10.34		7693	10273	40053	21109
4.43	23.22	10.11	5.68	13.83	33.76		2931	32412	27427	8202
3.49	10.75	5.87	3.91	7.96	26.75		11254	31317	9445	3503
0.97	12.56	13.23	8.48	30.89	16.6		9690	12954	4807	3669
5.25	25.53	6.93	10.63	9.79	34.42		7248	7757	40058	27351
11.88	25.68	21.82	33.31	4.75	14.37		40584	23565	29755	7393
6.26	5.09	16.96	8.81	14.92	31.58		15438	7928	23376	6894
17.38	13.28	5.79	16.24	21.13	29.35		3164	39294	5961	16734
11.08	18.3	18.45	12.52	16.02	11.76		36707	45497	4929	5904
3.3	5.96	12.72	13.22	5.28	2.04		2645	4701	4625	3260
4.68	10.74	25.14	9.27	20.89	34.29		17142	38596	15074	2277
2.71	0.18	19.99	7.07	23.95	53.85		6768	29272	25010	9240
3.14	5	9.08	7.96	6.89	25.2		2978	5221	27848	1665
4.38	9.23	16.94	12.32	17.34	29.59		3163	3140	26003	22099
0	19.55	22.29	16.54	5.6	25.36		17939	13969	20844	1933
0	3.36	14.61	0	8.55	27.96		2129	61143	47369	2365
5.35	12.85	3.94	10.14	12.57	28.01		6016	23889	46070	2338
21.65	24.61		14.53	7.71	19.05		16605	38274	18105	3188
6.72	29.01		20.76	8.8	27.27		24617	22399	56068	2249
5.82	17.13		8.59	4.49	18.25		1930	36782	51149	3113
12.74	13.9		40.93	6.02	30.48		3483	22982	25766	2675
24.62	16.78		31.75	5.73	25.67		5943	12486	46899	2521
0	14.35		11.14	11.44	30.24		18743	31310	36865	3551
8.72	24.08		14.88	16.07	8.42		9420	24278	18903	4568
3.83	19.22		27.45	29.6	20.64		13859	23080	6621	3112
15.01	18.99		19.96	3.3	67.42		6461	4192	26362	2363
21.01	10.9		26.59	10.84	40.89		3489	19222	4270	9990
7.42	29.72		5.26	6.2	54.91		2551	39362	5510	3110
0	22.66		4.9	13.1	34.18		17921	3206	43228	3191
4.55	9.59		9.02	6.46	3.45		4805	49841	63277	3811
0	5.63		36.78	11.65	41.27		5458	33461	6414	2764
12.11	20.94		10.23	2.41	20.74		38212	25660	3613	10556
1.73	6.18		2.24	6.41	18.13		2402	51547	12327	3220
4.35	16.86		16.7	16.94	15.1			21114	57805	2652
3.35			11.91	13.5	22.07			30398		1615
0				26.37	39.52
3.83				16.72	33.6
12.61				5.43	55.33
0				19.74	24.29
5.13				2.2	29.12
3.72				20.99	10.55
6.35				10.35	38.53
